# Supplementary material
Source: PubMed Central journal article supplement (PMC10278806)
Supplement: cjasn-18-563-s001.pdf [file cjasn-18-563-s001.pdf]

## **Supplemental Material**

### *Contents*

Supplemental Table 1: Search strategy for records addressing component D (Medline example)

Supplemental Table 2: Description of included studies, with relevance and quality scoring

Supplemental Table 3: PRISMA checklist

Supplemental Table 4: Glossary of contexts, mechanisms, and outcomes with examples from included studies

Supplemental Table 1: Search strategy for records addressing component D (Medline example)

Ovid MEDLINE(R) ALL <1946 to 02 July 2021>

|                                     |                                                                                                                                                                                                                                                                                                                                                                                                 |
|-------------------------------------|-------------------------------------------------------------------------------------------------------------------------------------------------------------------------------------------------------------------------------------------------------------------------------------------------------------------------------------------------------------------------------------------------|
| Search 1: chronic kidney disease    | exp Renal Insufficiency, Chronic/ OR (chronic adj3 (kidney or renal)).mp OR (CKF or CKD or CRF or CRD).mp OR chronic disease/ and kidney diseases/ OR (predialys* or "pre-dialys*").mp.                                                                                                                                                                                                         |
| Search 2: Non-patient-facing review | ((virtual or internet or electronic or "web-based" or digital* or remote*) adj3 (clinic* or consultation* or consulting or referral* or "health system*")).mp. OR Telemedicine/ OR "remote consultation"/ OR telemedicine.mp. OR telenephrolog*.mp. OR telehealth.mp. OR "tele-nephrolog* ".mp. OR "shared care".mp. OR (review* adj5 (remote* or distant*)).mp. OR exp Medical Record Linkage/ |
| Final search                        | 1 AND 2                                                                                                                                                                                                                                                                                                                                                                                         |

Supplemental Table 2: Description of included studies, with relevance and quality scoring

**Abbreviations:** RCT: randomized controlled trial; CKD: chronic kidney disease; PCP: primary care practices; T2DM: Type 2 Diabetes; RAAS: renin-aldosterone-angiotensin system; CV: cardiovascular; eGFR: estimated glomerular filtration rate; QI: quality improvement; BP: blood pressure; PTH: parathyroid hormone

|   | <b>Study Year</b>                 | <b>Country Setting</b> | <b>Study design Patient characteristics</b>                                        | <b>Intervention description</b>                                                                                                                                                                                                                                                        | <b>Main reported outcomes</b>                                                                 | <b>Relevance score</b> | <b>Quality score</b> |
|---|-----------------------------------|------------------------|------------------------------------------------------------------------------------|----------------------------------------------------------------------------------------------------------------------------------------------------------------------------------------------------------------------------------------------------------------------------------------|-----------------------------------------------------------------------------------------------|------------------------|----------------------|
| 1 | Abdel-Kader <sup>31</sup><br>2011 | USA<br>30 PCPs         | Cluster RCT<br>248 patients with CKD stage 3b or greater not under nephrology care | <i>Intervention group:</i> Automated alert on primary care EPR for patients with eGFR<45ml/min/1.73m <sup>2</sup> , advising nephrology referral and testing of albumin: creatinine ratio<br><br><i>Comparator:</i> Usual care<br><br>CKD educational sessions for PCPs in both groups | No significant difference between groups in referral to nephrology or testing for albuminuria | ++                     | ++                   |
| 2 | Akbari <sup>32</sup><br>2004      | Canada<br>One PCP      | Before-after study<br>324 patients                                                 | Automated eGFR reporting<br>Educational program for GPs                                                                                                                                                                                                                                | Improved recording of CKD diagnosis in notes after intervention                               | -                      | +                    |
| 3 | Alamartine <sup>33</sup><br>2010  | France                 | Service report                                                                     | Electronic communication between GPs and nephrologists                                                                                                                                                                                                                                 | Few GPs engaged with the website, and it was costly, so was closed                            | ++                     | -                    |
| 4 | Barrett <sup>34</sup><br>2011     | Canada<br>5 PCPs       | RCT<br>474 patients with CKD 3-4                                                   | <i>Intervention group:</i> Nurse-coordinated clinical recommendations to GPs with access to nephrologist advice<br><br><i>Comparator:</i> usual care                                                                                                                                   | No change in eGFR decline or control of risk-factors                                          | ++                     | ++                   |
| 5 | Bello <sup>35</sup><br>2017       | Canada                 | Focus group study for patients, GPs, nephrologists, policymakers                   | IT platform allowing communication between GPs and nephrologists in lieu of avoid patient-facing nephrology consult                                                                                                                                                                    | Favorable responses from stakeholders on this system                                          | ++                     | ++                   |

|    | <b>Study Year</b>                              | <b>Country Setting</b>                                        | <b>Study design Patient characteristics</b>                 | <b>Intervention description</b>                                                                                                                                                                                                                        | <b>Main reported outcomes</b>                                                                               | <b>Relevance score</b> | <b>Quality score</b> |
|----|------------------------------------------------|---------------------------------------------------------------|-------------------------------------------------------------|--------------------------------------------------------------------------------------------------------------------------------------------------------------------------------------------------------------------------------------------------------|-------------------------------------------------------------------------------------------------------------|------------------------|----------------------|
| 6  | Bello <sup>36</sup><br>2019                    | Canada<br>All PCPs in Alberta                                 | Service report<br>118 advice requests for patients with CKD | IT platform allowing communication between GPs and nephrologists in lieu of avoid patient-facing nephrology consult (as in Belo, 2017)                                                                                                                 | 31 of 118 (26%) of advice requests indicated a face-to-face nephrology consult. Mean response time 5.7 days | ++                     | -                    |
| 7  | Betancourt <sup>37</sup><br>2020<br>[Abstract] | USA<br>PCPs in Florida                                        | Service report<br>169 patients with CKD                     | 'Telenephrology' clinic including video-on-demand, telemedicine and e-consultation, implemented during the COVID-19 pandemic                                                                                                                           | Improved blood pressure control and biochemical parameters                                                  | +                      | -                    |
| 8  | Boom <sup>38</sup><br>2020                     | Netherlands<br>Referrals to 3 nephrology centers from any PCP | Service report<br>173 consultations with patients with CKD  | e-consultation system implemented to allow GPs to consult directly with nephrologist                                                                                                                                                                   | 141 of 173 e-consultations resulted in a nephrology clinic appointment.                                     | ++                     | -                    |
| 9  | Brimble <sup>39</sup><br>2020                  | Canada<br>2 nephrology sites and referring PCPs               | Before-after study<br>All patients with CKD                 | Online toolkit promoting CKD management and appropriate nephrology referral, promoted to GPs via consultation letters and other means                                                                                                                  | No difference found in appropriateness of referrals after implementation                                    | ++                     | +                    |
| 10 | Carroll <sup>40</sup><br>2018                  | USA<br>30 PCPs                                                | Cluster RCT<br>6699 patients with CKD stages 3 and 4        | <i>Intervention group:</i> Clinical decision support system (point of care prompts for screening, diagnosis, and management of CKD) with practice facilitation and CKD registry development<br><br><i>Comparator:</i> Clinical decision support alone. | Reduction in CKD progression in the intervention group                                                      | ++                     | ++                   |

|    | <b>Study Year</b>                     | <b>Country Setting</b>                    | <b>Study design Patient characteristics</b>                                       | <b>Intervention description</b>                                                                                                                                            | <b>Main reported outcomes</b>                                                                                                                                              | <b>Relevance score</b> | <b>Quality score</b> |
|----|---------------------------------------|-------------------------------------------|-----------------------------------------------------------------------------------|----------------------------------------------------------------------------------------------------------------------------------------------------------------------------|----------------------------------------------------------------------------------------------------------------------------------------------------------------------------|------------------------|----------------------|
| 11 | Carter <sup>41</sup><br>2015          | USA<br>32 PCPs                            | Cluster RCT<br>625 patients with CKD 3-5, diabetes, and uncontrolled hypertension | <i>Intervention groups:</i> 9- or 24-month intervention with community pharmacist making recommendations to GP based on clinical data<br><br><i>Comparator:</i> usual care | No difference in BP control but reduction in mean BP                                                                                                                       | ++                     | ++                   |
| 12 | Chang <sup>42</sup><br>2016           | USA<br>6 PCPs                             | Cluster RCT<br>Patients with CKD 3a                                               | <i>Intervention group:</i> Pharmacist intervention to promote albuminuria testing, statin prescription and BP treatment<br><br><i>Comparator:</i> usual care               | No difference in albuminuria screening. Positive feedback from patients, pharmacists, and GPs                                                                              | ++                     | ++                   |
| 13 | Cooney <sup>43</sup><br>2015          | USA<br>13 PCPs                            | RCT<br>2199 patients with CKD 3b-5                                                | <i>Intervention group:</i> training, education, access to CKD registry, pharmacist phone calls to patients<br><br><i>Comparator:</i> usual care                            | No difference in BP control. Increased monitoring of PTH, improved guideline adherence                                                                                     | ++                     | ++                   |
| 14 | Cortés-Sanabria <sup>44</sup><br>2008 | Mexico                                    | Pilot study for cluster RCT<br>96 patients with T2DM CKD under the care of 40 GPs | <i>Intervention group:</i> Participative GP educational program<br><br><i>Comparator:</i> usual care                                                                       | GP 'clinical competence' (based on a questionnaire) was greater in the intervention group<br><br>No significant difference in patient's clinical parameters between groups | +                      | +                    |
| 15 | Crowley <sup>45</sup><br>2017         | USA<br>Veterans affairs healthcare system | Service report<br>Military veterans with CKD                                      | Description of synchronous and asynchronous nephrology consultation systems                                                                                                | Description of benefits includes improved access to care, patient choice, patient-centered care                                                                            | +                      | +                    |

|    | <b>Study Year</b>                               | <b>Country Setting</b>                                            | <b>Study design Patient characteristics</b>                                                              | <b>Intervention description</b>                                                                                                                                                      | <b>Main reported outcomes</b>                                                                                                                                                     | <b>Relevance score</b> | <b>Quality score</b> |
|----|-------------------------------------------------|-------------------------------------------------------------------|----------------------------------------------------------------------------------------------------------|--------------------------------------------------------------------------------------------------------------------------------------------------------------------------------------|-----------------------------------------------------------------------------------------------------------------------------------------------------------------------------------|------------------------|----------------------|
| 16 | Donald <sup>47</sup><br>2021                    | Canada<br><br>Available worldwide but promoted to PCPs in Alberta | Before-after study<br><br>345,058 patients, most with CKD3a identified through linked health record data | Online 'CKD pathway' treatment guidance document                                                                                                                                     | Improvement in albuminuria screening in regions where the intervention was used                                                                                                   | ++                     | +                    |
| 17 | Drawz <sup>48</sup><br>2012                     | USA<br><br>2 PCPs                                                 | Cluster RCT<br><br>781 patients with CKD                                                                 | <i>Intervention group:</i> Access to and training in use of CKD registry identifying patient with CKD<br><br><i>Comparator:</i> usual care<br><br>CKD lecture to PCPs in both groups | Primary outcome (PTH measurement) – improvement in both groups<br><br>Secondary outcomes (other clinical measures, BP improvement and treatment with RAAS blocker – no difference | ++                     | ++                   |
| 18 | Elsayed <sup>49</sup><br>2013<br><br>[Abstract] | UK<br><br>Referring PCPs for Sheffield renal service              | Service report<br><br>77 patients with CKD not expected to require RRT within 12 months                  | Remote monitoring via CKD nurse reviewing laboratory parameters and BP                                                                                                               | Feasibility, reduced travel time, positive patient feedback                                                                                                                       | ++                     | -                    |
| 19 | Ennis <sup>50</sup><br>2015                     | Canada<br><br>All PCPs where intervention is available            | Matched cohort study<br><br>12,353 patients with CKD 3-4                                                 | Automated clinical decision support system (compared to usual care) available to GPs receiving reports from a commercial laboratory                                                  | Improved adherence to testing guidelines among GPs using the system                                                                                                               | ++                     | +                    |

|    | <b>Study Year</b>                             | <b>Country Setting</b>                                            | <b>Study design Patient characteristics</b>                         | <b>Intervention description</b>                                                                                                                                    | <b>Main reported outcomes</b>                                                                                                                   | <b>Relevance score</b> | <b>Quality score</b> |
|----|-----------------------------------------------|-------------------------------------------------------------------|---------------------------------------------------------------------|--------------------------------------------------------------------------------------------------------------------------------------------------------------------|-------------------------------------------------------------------------------------------------------------------------------------------------|------------------------|----------------------|
| 20 | Erler <sup>51</sup><br>2012                   | Frankfurt, Germany<br>44 PCPs                                     | Cluster RCT<br>404 patients with CKD (or over 70 with hypertension) | <i>Intervention group:</i> Provision of software program to aid drug dose adjustment in CKD; GP training<br><i>Comparator:</i> usual care                          | Reduction in prescription of contraindicated drugs or dosing in excess of recommended maximum doses                                             | +                      | ++                   |
| 21 | Feldstein <sup>52</sup><br>2011<br>[Abstract] | USA<br>20 PCPs                                                    | Service report and GP survey<br>67 patients with CKD                | Web-based tool including patient-specific treatment recommendations, clinical guideline access, electronic nephrology consultation, and patient education material | Use of the tool associated with increased attainment of treatment guidelines, improvement in GP test scores, but no change in GP self-efficacy. | ++                     | -                    |
| 22 | Fox <sup>53</sup><br>2008                     | Buffalo, NJ, USA<br>2 PCPs in area with high level of deprivation | QI intervention<br>181 patients with CKD                            | GP educational visits, reminders, data provision, electronic decision-making support.                                                                              | Improved CKD recognition and reduced prescription of NSAIDs and metformin. Small improvement in eGFR after intervention                         | ++                     | +                    |
| 23 | Haley <sup>54</sup><br>2014                   | USA<br>9 PCPs                                                     | QI project                                                          | Promotion of a toolkit aiming to improve CKD identification, management, and communication                                                                         | Improved CKD identification, referral, management, and eGFR recording                                                                           | ++                     | +                    |
| 24 | Al-Hamarneh <sup>55</sup><br>2017             | Alberta, Canada<br>56 PCPs                                        | Subgroup analysis of RCT<br>290 patients with CKD stages 3-5        | <i>Intervention:</i> Individualized patient CV risk assessment and treatment recommendations with regular monthly follow-up<br><i>Comparator:</i> usual care       | Improved CV risk profile in intervention group                                                                                                  | ++                     | ++                   |
| 25 | Hardy <sup>56</sup><br>2019<br>[Abstract]     | UK<br>55 PCPs                                                     | Service report<br>Patients with CKD and diabetes                    | Standardized review of patients on CKD and diabetes registers at surgeries. Video consultation events where 20 patients were discussed                             | Feasibility of this service model                                                                                                               | ++                     | -                    |

|    | <b>Study Year</b>               | <b>Country Setting</b>                                           | <b>Study design Patient characteristics</b>                                     | <b>Intervention description</b>                                                                                                                                        | <b>Main reported outcomes</b>                                                                                                                                               | <b>Relevance score</b> | <b>Quality score</b> |
|----|---------------------------------|------------------------------------------------------------------|---------------------------------------------------------------------------------|------------------------------------------------------------------------------------------------------------------------------------------------------------------------|-----------------------------------------------------------------------------------------------------------------------------------------------------------------------------|------------------------|----------------------|
| 26 | Harnett <sup>57</sup><br>2018   | UK<br>PCPs for patients discharged from a CKD clinic in Southend | Service report<br>Patients with CKD discharged from nephrology follow-up        | 'Virtual clinic': laboratory tests performed in primary care with non-patient-facing nephrologist review and management advice, including recall to nephrology clinic. | Feasibility. No patients required emergency dialysis initiation. Patient survival was comparable to patients with CKD discharged without virtual clinic monitoring          | ++                     | -                    |
| 27 | Hull <sup>58</sup><br>2020      | UK<br>PCPs served by an East London renal unit                   | Service report                                                                  | Electronic patient record detection of patients with progressive CKD with embedded management advice, non-patient-facing nephrologist review, GP education.            | 3-fold increase in nephrology referrals, reduced time to (non-patient-facing) nephrologist consultation, increased CKD coding, positive feedback from GPs and nephrologists | ++                     | -                    |
| 28 | Humphreys <sup>59</sup><br>2017 | Manchester, UK<br>49 PCPs                                        | Phased QI projects                                                              | Educational workshops, clinical decision support tool, clinical facilitators, financial support                                                                        | Improved coding of CKD in primary care records, improved BP                                                                                                                 | ++                     | +                    |
| 29 | Jones <sup>60</sup><br>2006     | UK<br>PCPs served by a single renal unit                         | Service report<br>949 referrals for patients with CKD                           | Shared care scheme – patients have blood and BP monitoring in primary care and are reviewed in absentia by nephrologists                                               | Reduction in requirement for face-to-face clinics.                                                                                                                          | ++                     | -                    |
| 30 | Katz <sup>61</sup><br>2018      | Australia<br>PCPs served by a single renal unit                  | Service report<br>70 patients with CKD from primary care and nephrology clinics | Monitoring of CKD via specialist nurse and non-patient-facing nephrology review.                                                                                       | Feasibility, safety, and improved access to nephrology advice                                                                                                               | ++                     | -                    |



|    | <b>Study Year</b>                        | <b>Country Setting</b>                                | <b>Study design Patient characteristics</b>                                                                 | <b>Intervention description</b>                                                                                                                                                                                                                | <b>Main reported outcomes</b>                                                                                                                                                                                                                           | <b>Relevance score</b> | <b>Quality score</b> |
|----|------------------------------------------|-------------------------------------------------------|-------------------------------------------------------------------------------------------------------------|------------------------------------------------------------------------------------------------------------------------------------------------------------------------------------------------------------------------------------------------|---------------------------------------------------------------------------------------------------------------------------------------------------------------------------------------------------------------------------------------------------------|------------------------|----------------------|
| 31 | Keely <sup>62</sup><br>2018              | Canada<br>PCPs submitting requests to Ottawa hospital | Service report<br>155 nephrology eConsults for CKD                                                          | e-consultation service                                                                                                                                                                                                                         | Avoided face-to-face consult in 45%. Nature of clinical questions is described                                                                                                                                                                          | ++                     | -                    |
| 32 | Khoong <sup>63</sup><br>2019             | USA<br>79 PCPs                                        | Cluster RCT protocol<br>582 patients with CKD                                                               | <i>Intervention arms:</i> 1) GP access to Clinical decision support system (CDSS) based on serum creatinine, cystatin C and albumin: creatinine ratio readings 2) CDSS plus a pharmacist phone call to GP<br><br><i>Comparator:</i> usual care | Feasibility                                                                                                                                                                                                                                             | ++                     | ++                   |
| 33 | Levy <sup>64</sup><br>2020<br>[Abstract] | USA<br>PCPs served by single nephrology department    | Service report<br>62 patients referred for e-consultation                                                   | Implementation of e-consultation system                                                                                                                                                                                                        | Feasibility<br>Satisfaction with system among GPs<br>Prioritization of patients for face-to-face appointments                                                                                                                                           | ++                     | -                    |
| 34 | Liddy <sup>65</sup><br>2013              | Canada<br>Regional health district in Ontario         | Service report, with recommended steps for implementation in other settings<br>Patients with CKD in Ontario | Implementation of an e-consultation service                                                                                                                                                                                                    | Reported steps to success: Establishing key working partnerships, choice of electronic platform, pilot work, designing e-consultation form, information governance, simple processes for physicians, payment, continuous feedback/QI, planning roll-out | ++                     | +                    |

|    | <b>Study Year</b>                  | <b>Country Setting</b>                       | <b>Study design Patient characteristics</b>                        | <b>Intervention description</b>                                                                                                                                                                                                                                                                                                                   | <b>Main reported outcomes</b>                                                                                                | <b>Relevance score</b> | <b>Quality score</b> |
|----|------------------------------------|----------------------------------------------|--------------------------------------------------------------------|---------------------------------------------------------------------------------------------------------------------------------------------------------------------------------------------------------------------------------------------------------------------------------------------------------------------------------------------------|------------------------------------------------------------------------------------------------------------------------------|------------------------|----------------------|
| 35 | Litvin <sup>66</sup><br>2016       | South Carolina, USA<br>11 PCPs               | Before-after study<br>Patients with CKD stages 3-5                 | Clinical decision support system                                                                                                                                                                                                                                                                                                                  | Improved albuminuria screening and monitoring.<br>No difference in RAAS blockade prescription or anemia monitoring           | ++                     | +                    |
| 36 | de Lusignana <sup>46</sup><br>2013 | Guildford, UK<br>93 PCPs                     | Cluster RCT<br>41,183 patients with CKD                            | <i>Intervention 1:</i> 'Audit-based education' feedback and training for GPs at data workshops, provision of printed guidance and target patient lists<br><br><i>Intervention 2:</i> provision of 'guidelines and prompts'<br><br><i>Comparator:</i> usual care                                                                                   | Intervention 1: reduction in BP compared to other groups<br><br>No other differences between groups in BP, CV events or eGFR | ++                     | ++                   |
| 37 | Major <sup>67</sup><br>2019        | UK<br>23 PCPs                                | Cluster RCT<br>23,357 patients with CKD stages 3-5 in primary care | <i>Intervention:</i> Electronic screening of primary care EPR generating a database of patients with CKD at each practice, and CKD nurse practitioner interpreting this database to recommend management changes for individual patients.<br><br><i>Comparator:</i> Practice received database results but without nurse practitioner involvement | Improved coding of CKD and proteinuria in the intervention group.<br><br>No difference in eGFR at 42 months between groups   | ++                     | ++                   |
| 38 | Manns <sup>68</sup><br>2012        | Alberta, Canada<br>93 Primary care practices | Cluster RCT<br>5444 Elderly patient with CKD                       | <i>Intervention:</i> Enhanced eGFR laboratory prompt containing management advice based on eGFR advising albuminuria measurement and prescription of RAAS blockers<br><br><i>Comparator:</i> Standard eGFR prompt                                                                                                                                 | No difference in prescription of RAAS blockers                                                                               | ++                     | ++                   |

|    | <b>Study Year</b>                           | <b>Country Setting</b>                                                             | <b>Study design Patient characteristics</b>                                              | <b>Intervention description</b>                                                                                                                         | <b>Main reported outcomes</b>                                                                                                                   | <b>Relevance score</b> | <b>Quality score</b> |
|----|---------------------------------------------|------------------------------------------------------------------------------------|------------------------------------------------------------------------------------------|---------------------------------------------------------------------------------------------------------------------------------------------------------|-------------------------------------------------------------------------------------------------------------------------------------------------|------------------------|----------------------|
| 39 | Mark <sup>69</sup><br>2011                  | UK<br>Regional nephrology center                                                   | Service report with cost comparison<br>427 patients                                      | Implementation of a non-patient-facing nephrologist review                                                                                              | 12% of overall referrals managed with non-patient-facing review<br><br>Improved time to nephrologist response compared to patient-facing clinic | ++                     | -                    |
| 40 | Mendu <sup>71</sup><br>2016                 | USA<br>Single nephrology service and referring PCPs                                | Service report of pilot study<br>74 patient referrals                                    | Implementation of e-consultation system                                                                                                                 | Feasibility<br><br>High level of nephrologist and GP satisfaction                                                                               | ++                     | -                    |
| 41 | Mendu <sup>70</sup><br>2019                 | USA<br>Healthcare system in Massachusetts                                          | Service report<br>60,503 patients with CKD in primary care                               | Implementation of CKD registry identifying patients with CKD and recommending monitoring, RAAS blockade, medications optimization, and planning for RRT | Use of CKD registry can identify patients not in receipt of evidence-based treatment                                                            | ++                     | -                    |
| 42 | Ong <sup>72</sup><br>2019                   | Canada<br>52 PCPs                                                                  | Implementation study<br>250 standard referrals and 106 electronic consultation referrals | 1 year pilot of e-consultation system for nephrology referrals.                                                                                         | Feasibility. Acceptability to clinicians. Shorter time to nephrology input compared to standard referrals                                       | ++                     | +                    |
| 43 | Peralta <sup>74</sup><br>2019<br>[Abstract] | Abstract describing study 45 (Peralta 2020), also described in study 33 (protocol) |                                                                                          |                                                                                                                                                         |                                                                                                                                                 |                        |                      |

|    | <b>Study Year</b>              | <b>Country Setting</b>       | <b>Study design Patient characteristics</b>           | <b>Intervention description</b>                                                                                                                                                                                                                | <b>Main reported outcomes</b>                                                                                                                                                                                                                                           | <b>Relevance score</b> | <b>Quality score</b> |
|----|--------------------------------|------------------------------|-------------------------------------------------------|------------------------------------------------------------------------------------------------------------------------------------------------------------------------------------------------------------------------------------------------|-------------------------------------------------------------------------------------------------------------------------------------------------------------------------------------------------------------------------------------------------------------------------|------------------------|----------------------|
| 44 | Peralta <sup>73</sup><br>2020  | USA<br>80 PCPs               | Cluster RCT<br>524 patients with CKD                  | <i>Intervention arms:</i> 1) GP access to Clinical decision support system (CDSS) based on serum creatinine, cystatin C and albumin: creatinine ratio readings 2) CDSS plus a pharmacist phone call to GP<br><br><i>Comparator:</i> usual care | No difference in blood pressure between groups<br><br>GPs had increased awareness of CKD in intervention groups                                                                                                                                                         | ++                     | ++                   |
| 45 | Rayner <sup>75</sup><br>2013   | UK<br>Regional renal service | Before-after study                                    | Multiple interventions including education sessions for GPs, multidisciplinary care for patients nearing ESKD, routine eGFR reporting, eGFR decline surveillance with nephrologist oversight, communication to patients by letter              | Reduced incidence of RRT initiation<br><br>Increased use of peritoneal dialysis or hemodialysis initiation with permanent vascular access<br><br>Majority of patients planned for conservative (non-dialysis) treatment of kidney failure were managed outside hospital | ++                     | +                    |
| 46 | Regan <sup>76</sup><br>2017    | USA<br>80 PCPs               | GP survey                                             | Clinical algorithm embedded in primary care EPR<br><br>Education for practice clinicians                                                                                                                                                       | Acceptability to GPs<br><br>Improved knowledge among primary care clinicians                                                                                                                                                                                            | ++                     | -                    |
| 47 | Richards <sup>77</sup><br>2007 | UK<br>34 PCPs                | Before-after study<br>483 patients with CKD stage 4-5 | Automated patient identification with advice on clinical management delivered by community-based CKD nurses                                                                                                                                    | Improvement in CV risk parameters and reduction in eGFR decline after intervention                                                                                                                                                                                      | ++                     | +                    |

|    | <b>Study Year</b>                                                     | <b>Country Setting</b>                                  | <b>Study design Patient characteristics</b>                                                                                                                     | <b>Intervention description</b>                                                                                                                                                                                 | <b>Main reported outcomes</b>                                                                                                                                         | <b>Relevance score</b> | <b>Quality score</b> |
|----|-----------------------------------------------------------------------|---------------------------------------------------------|-----------------------------------------------------------------------------------------------------------------------------------------------------------------|-----------------------------------------------------------------------------------------------------------------------------------------------------------------------------------------------------------------|-----------------------------------------------------------------------------------------------------------------------------------------------------------------------|------------------------|----------------------|
| 48 | Scherpbier-de Haan <sup>78</sup><br>2013 [initial implementation....] | Netherlands<br>28 PCPs served by 5 nephrology practices | Service report<br>122 new consultations                                                                                                                         | Non-patient-facing nephrology consultation system implemented                                                                                                                                                   | Face to face consultation required in minority of patients referred to the non-patient-facing service<br><br>Reduction in nephrologist time required for consultation | ++                     | -                    |
| 49 | Scherpbier-de Haan <sup>79</sup><br>2013 [effect of shared....]       | Netherlands<br>9 PCPs                                   | Cluster RCT                                                                                                                                                     | <i>Intervention:</i> 'Shared care' model for CKD. Education for primary care clinicians, protocolized review of care, nurse practitioner appointments under GP supervision<br><br><i>Comparator:</i> usual care | Reduced blood pressure and increased use of RAAS blockade and statins in intervention group                                                                           | ++                     | ++                   |
| 50 | Shen <sup>80</sup><br>2020                                            | China<br>CKD service of a provincial hospital           | Protocol for a mixed-methods study and (effectiveness-implementation) hybrid type 2 trial'                                                                      | Self-management intervention for patients with CKD                                                                                                                                                              | Protocol only                                                                                                                                                         | +                      | -                    |
| 51 | Stoves <sup>81</sup><br>2010                                          | Bradford, UK<br>17 PCPs                                 | Before-after study<br>466 patients                                                                                                                              | e-consultation for CKD as initial nephrology contact, replacing nephrology clinic as default option                                                                                                             | Reduction in referrals; positive feedback from GPs and nephrologists                                                                                                  | ++                     | +                    |
| 52 | Strait <sup>82</sup><br>2017                                          | USA<br>39 PCPs                                          | Post-implementation survey and focus group study<br><br>39 GPs surveyed, two focus groups with non-medical primary care staff, eight focus groups with patients | Primary care CKD registry with point-of-care EPR notifications and quarterly feedback document. Patient self-management support material and automated telephone coaching                                       | Acceptability to primary care teams.<br><br>Patients found automated telephone advice impersonal                                                                      | ++                     | +                    |

|    | <b>Study Year</b>                | <b>Country Setting</b>                                                            | <b>Study design Patient characteristics</b>                                                                | <b>Intervention description</b>                                                                                                                                                                                                                                          | <b>Main reported outcomes</b>                                                                                                                      | <b>Relevance score</b> | <b>Quality score</b> |
|----|----------------------------------|-----------------------------------------------------------------------------------|------------------------------------------------------------------------------------------------------------|--------------------------------------------------------------------------------------------------------------------------------------------------------------------------------------------------------------------------------------------------------------------------|----------------------------------------------------------------------------------------------------------------------------------------------------|------------------------|----------------------|
| 53 | Thomas <sup>83</sup><br>2014     | UK<br>29 PCPs                                                                     | Quality improvement project                                                                                | 'Self-management care bundle' including: 1) Measurement of proteinuria and prescription of RAAS blockade as indicated 2) Documentation of BP 3) calculating cardiovascular risk 4) Patient education<br><br>Education in self-management coaching for primary care staff | Increase in CKD coding and in the proportion of patients meeting BP targets<br><br>Feasibility of care bundle implementation                       | ++                     | +                    |
| 54 | Thomas <sup>84</sup><br>2019     | UK<br>136 PCPs in East London                                                     | Service report, qualitative evaluation<br><br>Eight semi-structured interviews with GPs and practice staff | Automated detection of CKD progression built in to primary care EPR with alerts to GPs                                                                                                                                                                                   | Primary care clinicians felt the tool promoted patient safety and clinician learning about CKD                                                     | ++                     | +                    |
| 55 | Tuot <sup>85</sup><br>2018       | USA<br><br>Two primary care clinics in San Francisco, with high prevalence of CKD | Cluster RCT<br><br>746 patients with CKD                                                                   | <i>Intervention:</i> CKD registry with point of care alerts for patients with CKD not meeting targets for BP, RAAS blockade prescription, or albuminuria testing<br><br><i>Comparator:</i> Usual care                                                                    | Increased prescription of RAAS blockers<br><br>No difference in BP, albuminuria or eGFR                                                            | ++                     | ++                   |
| 56 | van Gelder <sup>86</sup><br>2017 | Netherlands<br><br>47 PCPs                                                        | Cluster RCT<br><br>3004 patients with CKD                                                                  | <i>Intervention:</i> web based non-patient-facing nephrology consultation platform<br><br><i>Comparator:</i> Usual care<br><br>CKD management education for all participating practices                                                                                  | Positive opinions from GPs<br><br>No difference in rate of referral to standard nephrology clinics<br><br>No difference in quality of care or cost | ++                     | ++                   |

|    | <b>Study Year</b>              | <b>Country Setting</b>                                | <b>Study design Patient characteristics</b>                               | <b>Intervention description</b>                                                                                                                                                                    | <b>Main reported outcomes</b>                                                                                                         | <b>Relevance score</b> | <b>Quality score</b> |
|----|--------------------------------|-------------------------------------------------------|---------------------------------------------------------------------------|----------------------------------------------------------------------------------------------------------------------------------------------------------------------------------------------------|---------------------------------------------------------------------------------------------------------------------------------------|------------------------|----------------------|
| 57 | Via-Sosa <sup>87</sup><br>2013 | Barcelona, Spain<br><br>40 community pharmacies       | Before-after study<br><br>354 patients over 65 with CKD 3-5               | Pharmacist recommendations to GPs on drug dosing changes                                                                                                                                           | Increased proportion of adequate drug dosing, reduced frequency of 'drug-related issues which interfere with desired health outcomes' | +                      | +                    |
| 58 | Xu <sup>88</sup><br>2017       | Leicester, UK<br><br>48 PCPS                          | Before-after study<br><br>Patients with CKD and uncontrolled hypertension | IT tool to identify patients with CKD nurse disseminating information to PCP staff                                                                                                                 | Increase in CKD coding, improved BP control                                                                                           | ++                     | +                    |
| 59 | Yamagata <sup>89</sup><br>2016 | Japan<br><br>489 GPs at 49 local medical associations | Cluster RCT<br><br>2,379 patients with CKD in primary care                | <i>Intervention:</i> Patient education, patient letters updating them on CKD status, alerts to GPs highlighting patients not receiving recommended treatments<br><br><i>Comparator:</i> Usual care | Improved clinic attendance, higher nephrology referral rates, and reduced progression of CKD in the intervention group                | ++                     | ++                   |
| 60 | Zuniga <sup>90</sup><br>2020   | Chile<br><br>Nephrology services in 2 cities          | Service report<br><br>4668 nephrologist consultations                     | Implementation of non-patient-facing nephrologist consultation service                                                                                                                             | Feasibility<br><br>Reduced time to nephrology consultation                                                                            | +                      | -                    |

Supplemental Table 3: PRISMA checklist

| Section and Topic             | Item # | Checklist item                                                                                                                                                                                                                                                                                       | Location where item is reported   |
|-------------------------------|--------|------------------------------------------------------------------------------------------------------------------------------------------------------------------------------------------------------------------------------------------------------------------------------------------------------|-----------------------------------|
| <b>TITLE</b>                  |        |                                                                                                                                                                                                                                                                                                      |                                   |
| Title                         | 1      | Identify the report as a systematic review.                                                                                                                                                                                                                                                          | Title, abstract, methods          |
| <b>ABSTRACT</b>               |        |                                                                                                                                                                                                                                                                                                      |                                   |
| Abstract                      | 2      | See the PRISMA 2020 for Abstracts checklist.                                                                                                                                                                                                                                                         |                                   |
| <b>INTRODUCTION</b>           |        |                                                                                                                                                                                                                                                                                                      |                                   |
| Rationale                     | 3      | Describe the rationale for the review in the context of existing knowledge.                                                                                                                                                                                                                          | Intro                             |
| Objectives                    | 4      | Provide an explicit statement of the objective(s) or question(s) the review addresses.                                                                                                                                                                                                               | Intro                             |
| <b>METHODS</b>                |        |                                                                                                                                                                                                                                                                                                      |                                   |
| Eligibility criteria          | 5      | Specify the inclusion and exclusion criteria for the review and how studies were grouped for the syntheses.                                                                                                                                                                                          | Methods                           |
| Information sources           | 6      | Specify all databases, registers, websites, organisations, reference lists and other sources searched or consulted to identify studies. Specify the date when each source was last searched or consulted.                                                                                            | Methods                           |
| Search strategy               | 7      | Present the full search strategies for all databases, registers and websites, including any filters and limits used.                                                                                                                                                                                 | Supplementary methods 1           |
| Selection process             | 8      | Specify the methods used to decide whether a study met the inclusion criteria of the review, including how many reviewers screened each record and each report retrieved, whether they worked independently, and if applicable, details of automation tools used in the process.                     | Methods                           |
| Data collection process       | 9      | Specify the methods used to collect data from reports, including how many reviewers collected data from each report, whether they worked independently, any processes for obtaining or confirming data from study investigators, and if applicable, details of automation tools used in the process. | Methods                           |
| Data items                    | 10a    | List and define all outcomes for which data were sought. Specify whether all results that were compatible with each outcome domain in each study were sought (e.g. for all measures, time points, analyses), and if not, the methods used to decide which results to collect.                        | Methods                           |
|                               | 10b    | List and define all other variables for which data were sought (e.g. participant and intervention characteristics, funding sources). Describe any assumptions made about any missing or unclear information.                                                                                         | Methods                           |
| Study risk of bias assessment | 11     | Specify the methods used to assess risk of bias in the included studies, including details of the tool(s) used, how many reviewers assessed each study and whether they worked independently, and if applicable, details of automation tools used in the process.                                    | Methods                           |
| Effect measures               | 12     | Specify for each outcome the effect measure(s) (e.g. risk ratio, mean difference) used in the synthesis or presentation of results.                                                                                                                                                                  | Not applicable to our methodology |
| Synthesis methods             | 13a    | Describe the processes used to decide which studies were eligible for each synthesis (e.g. tabulating the study intervention characteristics and comparing against the planned groups for each synthesis (item #5)).                                                                                 | Methods                           |
|                               | 13b    | Describe any methods required to prepare the data for presentation or synthesis, such as handling of missing summary statistics, or data conversions.                                                                                                                                                | N/A                               |
|                               | 13c    | Describe any methods used to tabulate or visually display results of individual studies and syntheses.                                                                                                                                                                                               | Methods                           |
|                               | 13d    | Describe any methods used to synthesize results and provide a rationale for the choice(s). If meta-analysis was performed, describe the model(s), method(s) to identify the presence and extent of statistical heterogeneity, and software package(s) used.                                          | Methods                           |



| Section and Topic             | Item # | Checklist item                                                                                                                                                                                                                                                                       | Location where item is reported |
|-------------------------------|--------|--------------------------------------------------------------------------------------------------------------------------------------------------------------------------------------------------------------------------------------------------------------------------------------|---------------------------------|
|                               | 13e    | Describe any methods used to explore possible causes of heterogeneity among study results (e.g. subgroup analysis, meta-regression).                                                                                                                                                 | N/A                             |
|                               | 13f    | Describe any sensitivity analyses conducted to assess robustness of the synthesized results.                                                                                                                                                                                         | Methods                         |
| Reporting bias assessment     | 14     | Describe any methods used to assess risk of bias due to missing results in a synthesis (arising from reporting biases).                                                                                                                                                              | N/A                             |
| Certainty assessment          | 15     | Describe any methods used to assess certainty (or confidence) in the body of evidence for an outcome.                                                                                                                                                                                | Methods                         |
| <b>RESULTS</b>                |        |                                                                                                                                                                                                                                                                                      |                                 |
| Study selection               | 16a    | Describe the results of the search and selection process, from the number of records identified in the search to the number of studies included in the review, ideally using a flow diagram.                                                                                         | Results                         |
|                               | 16b    | Cite studies that might appear to meet the inclusion criteria, but which were excluded, and explain why they were excluded.                                                                                                                                                          | Results                         |
| Study characteristics         | 17     | Cite each included study and present its characteristics.                                                                                                                                                                                                                            | Supplementary table 1           |
| Risk of bias in studies       | 18     | Present assessments of risk of bias for each included study.                                                                                                                                                                                                                         | Supplementary table 1           |
| Results of individual studies | 19     | For all outcomes, present, for each study: (a) summary statistics for each group (where appropriate) and (b) an effect estimate and its precision (e.g. confidence/credible interval), ideally using structured tables or plots.                                                     | N/A                             |
| Results of syntheses          | 20a    | For each synthesis, briefly summarise the characteristics and risk of bias among contributing studies.                                                                                                                                                                               | N/A                             |
|                               | 20b    | Present results of all statistical syntheses conducted. If meta-analysis was done, present for each the summary estimate and its precision (e.g. confidence/credible interval) and measures of statistical heterogeneity. If comparing groups, describe the direction of the effect. | N/A                             |
|                               | 20c    | Present results of all investigations of possible causes of heterogeneity among study results.                                                                                                                                                                                       | N/A                             |
|                               | 20d    | Present results of all sensitivity analyses conducted to assess the robustness of the synthesized results.                                                                                                                                                                           | Supplementary table 1           |
| Reporting biases              | 21     | Present assessments of risk of bias due to missing results (arising from reporting biases) for each synthesis assessed.                                                                                                                                                              | Discussion                      |
| Certainty of evidence         | 22     | Present assessments of certainty (or confidence) in the body of evidence for each outcome assessed.                                                                                                                                                                                  | N/A                             |
| <b>DISCUSSION</b>             |        |                                                                                                                                                                                                                                                                                      |                                 |
| Discussion                    | 23a    | Provide a general interpretation of the results in the context of other evidence.                                                                                                                                                                                                    | Discussion                      |
|                               | 23b    | Discuss any limitations of the evidence included in the review.                                                                                                                                                                                                                      | Discussion                      |
|                               | 23c    | Discuss any limitations of the review processes used.                                                                                                                                                                                                                                | Discussion                      |
|                               | 23d    | Discuss implications of the results for practice, policy, and future research.                                                                                                                                                                                                       | Discussion                      |
| <b>OTHER INFORMATION</b>      |        |                                                                                                                                                                                                                                                                                      |                                 |
| Registration and protocol     | 24a    | Provide registration information for the review, including register name and registration number, or state that the review was not registered.                                                                                                                                       | Methods                         |
|                               | 24b    | Indicate where the review protocol can be accessed, or state that a protocol was not prepared.                                                                                                                                                                                       | Methods                         |
|                               | 24c    | Describe and explain any amendments to information provided at registration or in the protocol.                                                                                                                                                                                      | Methods                         |
| Support                       | 25     | Describe sources of financial or non-financial support for the review, and the role of the funders or sponsors in the review.                                                                                                                                                        | Title page                      |
| Competing                     | 26     | Declare any competing interests of review authors.                                                                                                                                                                                                                                   | Disclosure                      |

| Section and Topic                              | Item # | Checklist item                                                                                                                                                                                                                             | Location where item is reported |
|------------------------------------------------|--------|--------------------------------------------------------------------------------------------------------------------------------------------------------------------------------------------------------------------------------------------|---------------------------------|
| interests                                      |        |                                                                                                                                                                                                                                            |                                 |
| Availability of data, code and other materials | 27     | Report which of the following are publicly available and where they can be found: template data collection forms; data extracted from included studies; data used for all analyses; analytic code; any other materials used in the review. | Search terms in Appendix        |

From: Page MJ, McKenzie JE, Bossuyt PM, Boutron I, Hoffmann TC, Mulrow CD, et al. The PRISMA 2020 statement: an updated guideline for reporting systematic reviews. *BMJ* 2021;372:n71. doi: 10.1136/bmj.n71  
For more information, visit: <http://www.prisma-statement.org/>

Supplemental Table 4: Description of mechanisms and contexts and examples from the included studies

|                                   | Description                                                                                                                                                                                                                                                                                                                                                                                                                                                                                                                                                                                                                                                                                                                                                                           | Illustrative examples                                                                                                                                                                                                                                                                                                                                                                                                                                                                                                                                                                                                                                                                                                                                                                                                                                                                                                                      |
|-----------------------------------|---------------------------------------------------------------------------------------------------------------------------------------------------------------------------------------------------------------------------------------------------------------------------------------------------------------------------------------------------------------------------------------------------------------------------------------------------------------------------------------------------------------------------------------------------------------------------------------------------------------------------------------------------------------------------------------------------------------------------------------------------------------------------------------|--------------------------------------------------------------------------------------------------------------------------------------------------------------------------------------------------------------------------------------------------------------------------------------------------------------------------------------------------------------------------------------------------------------------------------------------------------------------------------------------------------------------------------------------------------------------------------------------------------------------------------------------------------------------------------------------------------------------------------------------------------------------------------------------------------------------------------------------------------------------------------------------------------------------------------------------|
| <b>Distal Mechanisms</b>          |                                                                                                                                                                                                                                                                                                                                                                                                                                                                                                                                                                                                                                                                                                                                                                                       |                                                                                                                                                                                                                                                                                                                                                                                                                                                                                                                                                                                                                                                                                                                                                                                                                                                                                                                                            |
| <i>Clinician Motivation [DM1]</i> | <p>The motivation of all clinicians involved in CKD to accept new ways of working, integrate them into practice, and to learn from this process.</p> <p>Higher levels of <i>clinician motivation</i> increase the likelihood of successful <i>learning while doing</i>, and clinicians' <i>ability to focus and act</i>.</p>                                                                                                                                                                                                                                                                                                                                                                                                                                                          | <p>A quality improvement initiative aiming to improve blood pressure control in patients with CKD<sup>59</sup> provided financial reimbursement for primary care services</p> <p>An 'audit based education' intervention<sup>46</sup> compared regional practices' rates of recommended CKD management, potentially motivating through competition</p> <p>General practitioners found that an automated system for identifying CKD risk "<i>stirred up or created greater awareness [of CKD]... amongst us</i>"<sup>84</sup></p>                                                                                                                                                                                                                                                                                                                                                                                                           |
| <i>Learning while doing [DM2]</i> | <p>Clinicians' learning through the process of delivering care for patients with CKD, supported by the components of the intervention.</p> <ul style="list-style-type: none"> <li>• <i>Situational learning [DM2a]</i>: gaining skills by encountering and solving clinical problems for the first time</li> <li>• <i>Contextual learning [DM2b]</i>: learning by applying knowledge in new contexts</li> <li>• <i>Longitudinal learning [DM2c]</i>: learning through longer-term management of patients with CKD, or management at population- rather than at individual-level</li> </ul> <p>Successful <i>learning while doing</i> increases <i>motivation</i>, through professional satisfaction, and empowers clinicians with the required knowledge to <i>focus and act</i>.</p> | <p>General practitioners engaging with a 'virtual CKD' service<sup>58</sup> reported learning through this process: "<i>The quality of [responses] is good....I understand a bit more now about the tests.</i>"</p> <p>Nephrologists delivering a non-patient-facing review service in the Netherlands<sup>78</sup> reported a 'learning curve' in the types of clinical queries they received from GPs.</p> <p>A multi-level intervention aimed at improving blood pressure control included quarterly feedback reports to general practitioners,<sup>82</sup> who reported '<i>it enhanced their ability to identify patients who had CKD, needed better blood pressure control or were due albuminuria quantification</i>'.</p> <p>Healthcare professionals visiting practices or reviewing patient data to support decision-making around CKD care<sup>53, 67, 88</sup> aim to support the process of <i>learning while doing</i>.</p> |
| <i>Workflow integration [DM3]</i> | <p>Integrating intervention components into the normal working lives of clinicians. Successful workflow integration will promote <i>learning while doing</i> and increase clinicians' <i>ability to focus and act</i>.</p>                                                                                                                                                                                                                                                                                                                                                                                                                                                                                                                                                            | <p>In a multifaceted intervention, point of care notifications to GPs<sup>82</sup> rated highly – 94% of GPs reported benefits to clinic workflow</p> <p>Use of computer decision support systems with individualized care recommendations for patients<sup>53</sup> or EPR-based reminders<sup>66</sup> demonstrated improvements in care delivery.</p> <p>Several interventions provided access to online guidance, integrated within electronic patient records or clinical decision support systems.<sup>39, 47, 53, 66</sup></p>                                                                                                                                                                                                                                                                                                                                                                                                      |

|                                                                   |                                                                                                                                                                                                                                                                                                                                                                                                                                                                                                              |                                                                                                                                                                                                                                                                                                                                                                                                                                                                                                                                                                                                                                             |
|-------------------------------------------------------------------|--------------------------------------------------------------------------------------------------------------------------------------------------------------------------------------------------------------------------------------------------------------------------------------------------------------------------------------------------------------------------------------------------------------------------------------------------------------------------------------------------------------|---------------------------------------------------------------------------------------------------------------------------------------------------------------------------------------------------------------------------------------------------------------------------------------------------------------------------------------------------------------------------------------------------------------------------------------------------------------------------------------------------------------------------------------------------------------------------------------------------------------------------------------------|
| <p><i>Accessible/dynamic interfaces [DM4]</i></p>                 | <p>The accessibility and dynamism of clinician interfaces with IT systems, or with other clinicians.</p> <p>IT systems should provide relevant information to clinicians at a relevant timepoint in care, allow appropriate action to be taken easily and quickly, and be accessible to all appropriate caregivers. Provision of support material should be integrated and rapid. If professional advice (nephrologist, pharmacist) is required then this should be easy to access, timely, and focused.</p> | <p>The success of a virtual CKD service<sup>58</sup> was attributed in part to shared (GP/nephrologist) access to the primary care EPR, allowing communication by these means.</p> <p>A web-based nephrology consultation service<sup>78</sup> ‘offers the ability to break down walls between primary and secondary care’. A similar service<sup>72</sup> was described as a ‘virtual corridor’ which helped GPs feel supported and empowered.</p> <p>Other interventions improved access to secondary care advice through remote/virtual consultation<sup>33, 86</sup> or direct engagement with primary care practices.<sup>88</sup></p> |
| <p><b>Proximal mechanisms</b></p>                                 |                                                                                                                                                                                                                                                                                                                                                                                                                                                                                                              |                                                                                                                                                                                                                                                                                                                                                                                                                                                                                                                                                                                                                                             |
| <p><i>Clinician ability to focus/act [PM1]</i></p>                | <p>The ability (through knowledge, skills, experience, confidence, <i>motivation</i>, time, opportunity) of clinicians to focus on and deliver effective CKD care</p>                                                                                                                                                                                                                                                                                                                                        | <p>An automated system identifying patients with worsening renal function, with supporting clinician education and nephrologist consultation service was reported to encourage a movement from reactive to proactive care of CKD by GPs.<sup>84</sup></p> <p>Computerized decision-support systems<sup>53, 66, 88</sup> aimed to increase the focus of primary care clinicians (by providing <i>accessible/dynamic interfaces with workflow integration</i>)</p>                                                                                                                                                                            |
| <p><i>Patient identification, recall and retention [PM2a]</i></p> | <p>Identifying patients with biochemical evidence of CKD but without a coded diagnosis, with resulting CKD ‘coding’ or registration, which supports recall of patients for testing, treatment, and monitoring. Retention of patients within treatment and monitoring structures</p>                                                                                                                                                                                                                          | <p>In Manchester, UK<sup>59</sup> a quality improvement program in 49 GP practices introduced a multi-faceted intervention to improve recall systems for patients, resulting in an increase in reported CKD prevalence.</p> <p>In East London,<sup>58</sup> the use of IT packages to flag patients with CKD was associated with increased rates of CKD coding.</p> <p>A community pharmacy-based CKD case finding and intervention program using CKD targeted screening guidelines was successful in identifying patients with CKD, with 41% having previously unrecognized CKD.<sup>55</sup></p>                                          |
| <p><i>Evidence-based process adherence [PM2b]</i></p>             | <p>Clinicians’ adherence to evidence-based processes in practice. Promoted by their <i>ability to focus and act</i></p>                                                                                                                                                                                                                                                                                                                                                                                      | <p>A multifaceted quality improvement program in GP practices in Manchester<sup>59</sup> which included a clinical decision support tool and education resulted in a greater proportion of patients with CKD achieving target BP control.</p> <p>Several other interventions specifically mention provision of evidence-based guidance<sup>39, 47, 66</sup></p>                                                                                                                                                                                                                                                                             |

|                                             |                                                                                                                                                                                                                                                                                                                                                                                                                                                                                                                                                                                                                                                                                                                                                                                                                                            |                                                                                                                                                                                                                                                                                                                                                                                                                                                                                                                                                                                                                                                                                                                                                                                                                                                                                                                                                                                                                              |
|---------------------------------------------|--------------------------------------------------------------------------------------------------------------------------------------------------------------------------------------------------------------------------------------------------------------------------------------------------------------------------------------------------------------------------------------------------------------------------------------------------------------------------------------------------------------------------------------------------------------------------------------------------------------------------------------------------------------------------------------------------------------------------------------------------------------------------------------------------------------------------------------------|------------------------------------------------------------------------------------------------------------------------------------------------------------------------------------------------------------------------------------------------------------------------------------------------------------------------------------------------------------------------------------------------------------------------------------------------------------------------------------------------------------------------------------------------------------------------------------------------------------------------------------------------------------------------------------------------------------------------------------------------------------------------------------------------------------------------------------------------------------------------------------------------------------------------------------------------------------------------------------------------------------------------------|
| <p><i>Patient factors [PM3]</i></p>         | <p>Distinct from clinicians' <i>evidence-based process adherence</i>, this describes any aspect of the patient's characteristics, circumstances, behavior, or access to care which influence the likelihood of patients receiving and implementing lifestyle or medication recommendations.</p> <p>This includes socioeconomic position, social support resources, activation, and health literacy. These factors may interact with the mode of care delivery. For instance, patients with higher levels of activation may respond more positively to treatment advice delivered in novel ways (eg: through no patient-facing nephrology review)</p> <p>The majority of included studies have not attempted to measure or address these important mechanisms, so the relative importance compared to other mechanisms remains unknown.</p> | <p>A pragmatic RCT of 13 US community outpatient clinics<sup>43</sup>redesigned care delivery, introducing a system where pharmacists reviewed medications and lifestyle factors with patients. Patient comments included "I liked that she reminded me to get labs, and made me remember to fill my medications" and "They're looking at me as an individual, individual attention is good, hard to find."</p> <p>A multi-level intervention aimed at improving blood pressure control included a patient-directed intervention in the form of a CKD self-management support programme.<sup>82</sup> Low-income patients appreciated and engaged with a telephone-based CKD-SMS program. They found that telephone health coaching was convenient though the automated telephone system was easy to use but impersonal.</p> <p>When implementing of an eHealth intervention originally used in the Netherlands in a Chinese population, authors describe adapting the intervention to a 'Chinese context'.<sup>80</sup></p> |
| <p><b>Parallel mechanisms</b></p>           |                                                                                                                                                                                                                                                                                                                                                                                                                                                                                                                                                                                                                                                                                                                                                                                                                                            |                                                                                                                                                                                                                                                                                                                                                                                                                                                                                                                                                                                                                                                                                                                                                                                                                                                                                                                                                                                                                              |
| <p><i>Resource reallocation [ParM1]</i></p> | <p>Changes in resource (infrastructure, IT, clinician time, clinician roles) made to support novel routes to CKD care delivery. These changes promote <i>differentiated care delivery</i> and together these processes promote other mechanisms which allow clinicians to deliver <i>positive population health outcomes</i></p>                                                                                                                                                                                                                                                                                                                                                                                                                                                                                                           | <p>A pragmatic RCT of 13 US community outpatient clinics<sup>43</sup>redesigned care delivery, introducing a system where pharmacists reviewed medications and lifestyle factors with patients and provided recommendations to GPs. They reported improved guideline adherence (using the proxy of PTH measurement) with this system.</p> <p>The use of remote nephrology consultation in Nijmegen, Netherlands<sup>78</sup>reduced use of face-to-face nephrology appointments, with reported savings of 493 euro per nephrology appointment 'saved'. Similarly, a specialist advice service allowed GPs to access nephrology advice without patient needing a secondary care clinic appointment.<sup>86</sup></p>                                                                                                                                                                                                                                                                                                          |

|                                             |                                                                                                                                                                                                                                                                                                                      |                                                                                                                                                                                                                                                                                                                                                                                                                                                                                                                                                                                                      |
|---------------------------------------------|----------------------------------------------------------------------------------------------------------------------------------------------------------------------------------------------------------------------------------------------------------------------------------------------------------------------|------------------------------------------------------------------------------------------------------------------------------------------------------------------------------------------------------------------------------------------------------------------------------------------------------------------------------------------------------------------------------------------------------------------------------------------------------------------------------------------------------------------------------------------------------------------------------------------------------|
| <i>Differentiated care delivery [ParM2]</i> | Broadening the methods and mechanisms used to deliver CKD care                                                                                                                                                                                                                                                       | <p>Several electronic or ‘virtual’ nephrology consult systems report that implementation reduced the need for face-to-face nephrology appointments, allowing easier or more rapid access to this resource for patients with more severe CKD.<sup>36, 43, 58, 72, 78</sup></p> <p>Changing the method of care delivery can also improve cost-effectiveness.<sup>53, 88</sup></p> <p>A community pharmacy-based CKD case finding and intervention program e.g., prescribing and ordering laboratory investigations reported a 20% reduction in risk of a major cardiovascular events.<sup>55</sup></p> |
| <b>Contexts</b>                             |                                                                                                                                                                                                                                                                                                                      |                                                                                                                                                                                                                                                                                                                                                                                                                                                                                                                                                                                                      |
| <i>Credibility [C1]</i>                     | The value of a clinical service and the advice or guidance it delivers, as perceived by the primary care team.                                                                                                                                                                                                       |                                                                                                                                                                                                                                                                                                                                                                                                                                                                                                                                                                                                      |
| <i>Clinical Judgement [C2]</i>              | The thought processes allowing clinicians to apply knowledge and guidance based on objective and subjective information about individual patients                                                                                                                                                                    | An RCT of GPs in the USA <sup>31</sup> randomized clinicians to receive an e-alert to prompt renal referral if the eGFR was below 45ml/min versus no e-alert. No difference in renal referral rates were seen, hypothesized to relate to patient-level factors that would make referral unnecessary or inappropriate.                                                                                                                                                                                                                                                                                |
| <i>Clinical data delivery [C3]</i>          | The ability of clinical systems including electronic patient records to deliver key data to guide clinical decision-making. Including kidney function expressed as estimated glomerular filtration rate and CKD risk estimation through GFR and albuminuria categories and kidney failure risk equation calculations |                                                                                                                                                                                                                                                                                                                                                                                                                                                                                                                                                                                                      |
| <i>Ambiguity[C4]</i>                        | Vagueness (or clarity) of the clinical guidance provided to primary care. Ambiguity may inhibit successful <i>learning while doing</i> , and reduce <i>clinician motivation</i>                                                                                                                                      |                                                                                                                                                                                                                                                                                                                                                                                                                                                                                                                                                                                                      |
| <i>Compatibility [C5]</i>                   | The ease with which novel modes of delivering care are compatible with work structures in primary care. Successful <i>workflow integration</i> depends on the proposed intervention component being compatible with existing work structures                                                                         | Web-based consultation services <sup>72, 78</sup> reported to be successful were quick and easy to use and “ <i>Save[d] administrative time and charting</i> ”                                                                                                                                                                                                                                                                                                                                                                                                                                       |

|                                                   |                                                                                                                                                                                                                                             |                                                                                                                                                                                                                                                                                                                                                                                                                                                                                                                                                                                                                                                                                                                                                                                                                |
|---------------------------------------------------|---------------------------------------------------------------------------------------------------------------------------------------------------------------------------------------------------------------------------------------------|----------------------------------------------------------------------------------------------------------------------------------------------------------------------------------------------------------------------------------------------------------------------------------------------------------------------------------------------------------------------------------------------------------------------------------------------------------------------------------------------------------------------------------------------------------------------------------------------------------------------------------------------------------------------------------------------------------------------------------------------------------------------------------------------------------------|
| <p><i>Geography [C6]</i></p>                      | <p>The geography of the region served by a clinical service, which may influence the ease of care delivery.</p>                                                                                                                             | <p>In Alberta, Canada, and the surrounding region<sup>36</sup> which has known rural/urban disparities in healthcare delivery, an electronic nephrology consult system was implemented. Higher rates of use were found in areas with lower population density.</p> <p>However, another study in Alberta reported reduced impact of an online clinical pathway for CKD care in rural regions <sup>47</sup>compared to in cities. In the cities of Calgary and Edmonton there were increases in uACR testing and prescription of RAAS blockers and statins, but this was not replicated in rural regions. Authors suggest that ‘the unique challenges experienced treating patients in rural locations, such as access to care barriers and WiFi access and reliability issues’ may explain this difference.</p> |
| <p><i>Organizational buy-in [C7]</i></p>          | <p>Distinct from the mechanism of <i>clinician motivation</i>, ‘<i>buy-in</i>’ describes the commitment of organizations (primary care practices, secondary care nephrology departments) to use intervention components to deliver care</p> | <p>A CKD registry implemented in San Francisco <sup>85</sup> attributed success in increasing rates of ACE inhibitor/ARB use and albuminuria quantification to promotion of a ‘team-based primary care approach’. The intervention included all primary care staff in the provision of audit data showing practice adherence to CKD management targets, and identifying patients not receiving recommended treatment.</p>                                                                                                                                                                                                                                                                                                                                                                                      |
| <p><b>Outcome</b></p>                             |                                                                                                                                                                                                                                             |                                                                                                                                                                                                                                                                                                                                                                                                                                                                                                                                                                                                                                                                                                                                                                                                                |
| <p><i>Positive population health outcomes</i></p> | <p>Intended to summarize the combination of reduced cardiovascular risk, reduced burden of risk associated with CKD progression, reduced mortality, reduced RRT update, and associated improvements in quality of life</p>                  |                                                                                                                                                                                                                                                                                                                                                                                                                                                                                                                                                                                                                                                                                                                                                                                                                |
